# Supplementary material for: Phosphonic acid self-assembled monolayer improved the properties of n-type organic field-effect transistors in air ambient
Source: Royal Society of Chemistry journal article supplement (doi:10.1039/c6ra17255e), 2016-01-01
Supplement: c6ra17255e1.pdf [file c6ra17255e1.pdf]

## Supporting Information For:

### Phosphonic acid self-assembled monolayer improved properties of n-type organic field-effect transistors in air ambient

Li Cao <sup>a</sup>, Yue Peng <sup>a</sup>, Zhefeng Li <sup>a\*</sup>

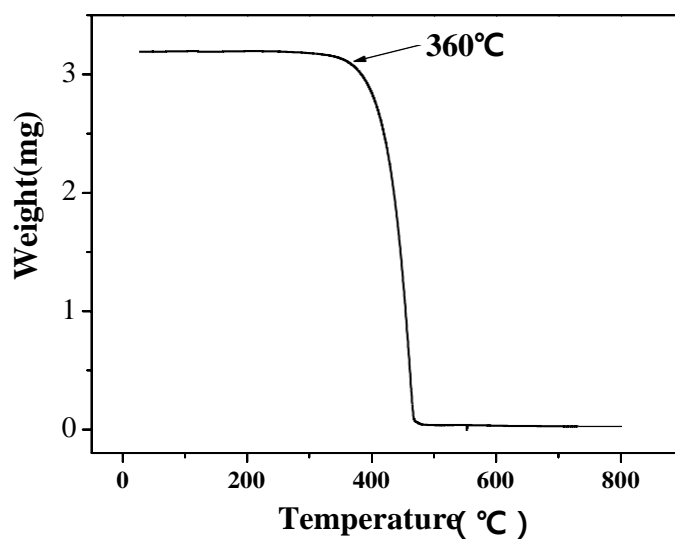

Supplementary Figure 1 The TGA curve of PDI-i8C compound
